# Supplementary material for: Identification of Riptortus pedestris Salivary Proteins and Their Roles in Inducing Plant Defenses
Source: MDPI journal article supplement (doi:10.3390/biology10080753), 2021-08-05
Supplement: s1 [file s1]

**Table S1 Primers used in this study**

| Gene                                        | Forward primer (5'-3')                         | Reverse primer (5'-3')                       |
|---------------------------------------------|------------------------------------------------|----------------------------------------------|
| <b>Primer used for plasmid construction</b> |                                                |                                              |
| RpSP13.8                                    | ACGAGCTGTACAAGGGTACCATGAAATATCCCAAGACAGCTTGC   | GCGGACTCTAGTTCATCTAGATTATCTTCCGTAGATTGTAATA  |
| RpSP30.2                                    | ACGAGCTGTACAAGGGTACCATGGAACCTCTGCGCCAGAAAAGG   | GCGGACTCTAGTTCATCTAGATTATGCGGCAGCTTGAGGCCT   |
| RpSP13.4                                    | ACGAGCTGTACAAGGGTACCATGTTACGAGCCTCATCAAAGCG    | GCGGACTCTAGTTCATCTAGATTAAATTCCCAGACTCAGCCTG  |
| RpSP10.3                                    | ACGAGCTGTACAAGGGTACCATGGAGCCTTTGTTTCTGAAGCGTG  | GCGGACTCTAGTTCATCTAGATCAGCAGTCATCTTCGCATTC   |
| RpSP17.8                                    | ACGAGCTGTACAAGGGTACCATGCAGAGAAATACCATTGACAATGC | GCGGACTCTAGTTCATCTAGATTAAACCTTGTGGTGATGGTCCC |
| <b>Primer used for qPCR</b>                 |                                                |                                              |
| NPR1                                        | TGCTCTCCATTATGCTGTAG                           | GCACTGTGTATCCTCTTGAA                         |
| PDF1.2                                      | TGGCAAAATCTATGCGCTTT                           | ATCCTTCGGTCAAACAGACG                         |
| PR1                                         | TGAGATGTGGGTCGATGAGA                           | CGAGTTACGCCAAACCACTT                         |
| PR4                                         | GGCCAAGATTCCTGTGGTAGAT                         | CACTGTTGTTTGAGTTCCTGTTCT                     |
| actin                                       | GGAGAAGTTGGCTTACATTG                           | TCATTGATGGTTGGAACAGA                         |
